# Supplementary material
Source: PubMed Central journal article supplement (PMC2665079)

**Suppl. Fig. 1.** Kinetic binding curves of the BIIB5 Fab injected over sensor chip surfaces containing purified and immobilized A. hIGF-1R(1-903)-Fc, B. mIGF-1R(1-904)-Fc, C. hIGF-1R(1-462)-Fc, D. hIGF-1R(1-903)-Fc(T478R), and E. hIGF-1R(1-903)-Fc(Y482A\_R483W).

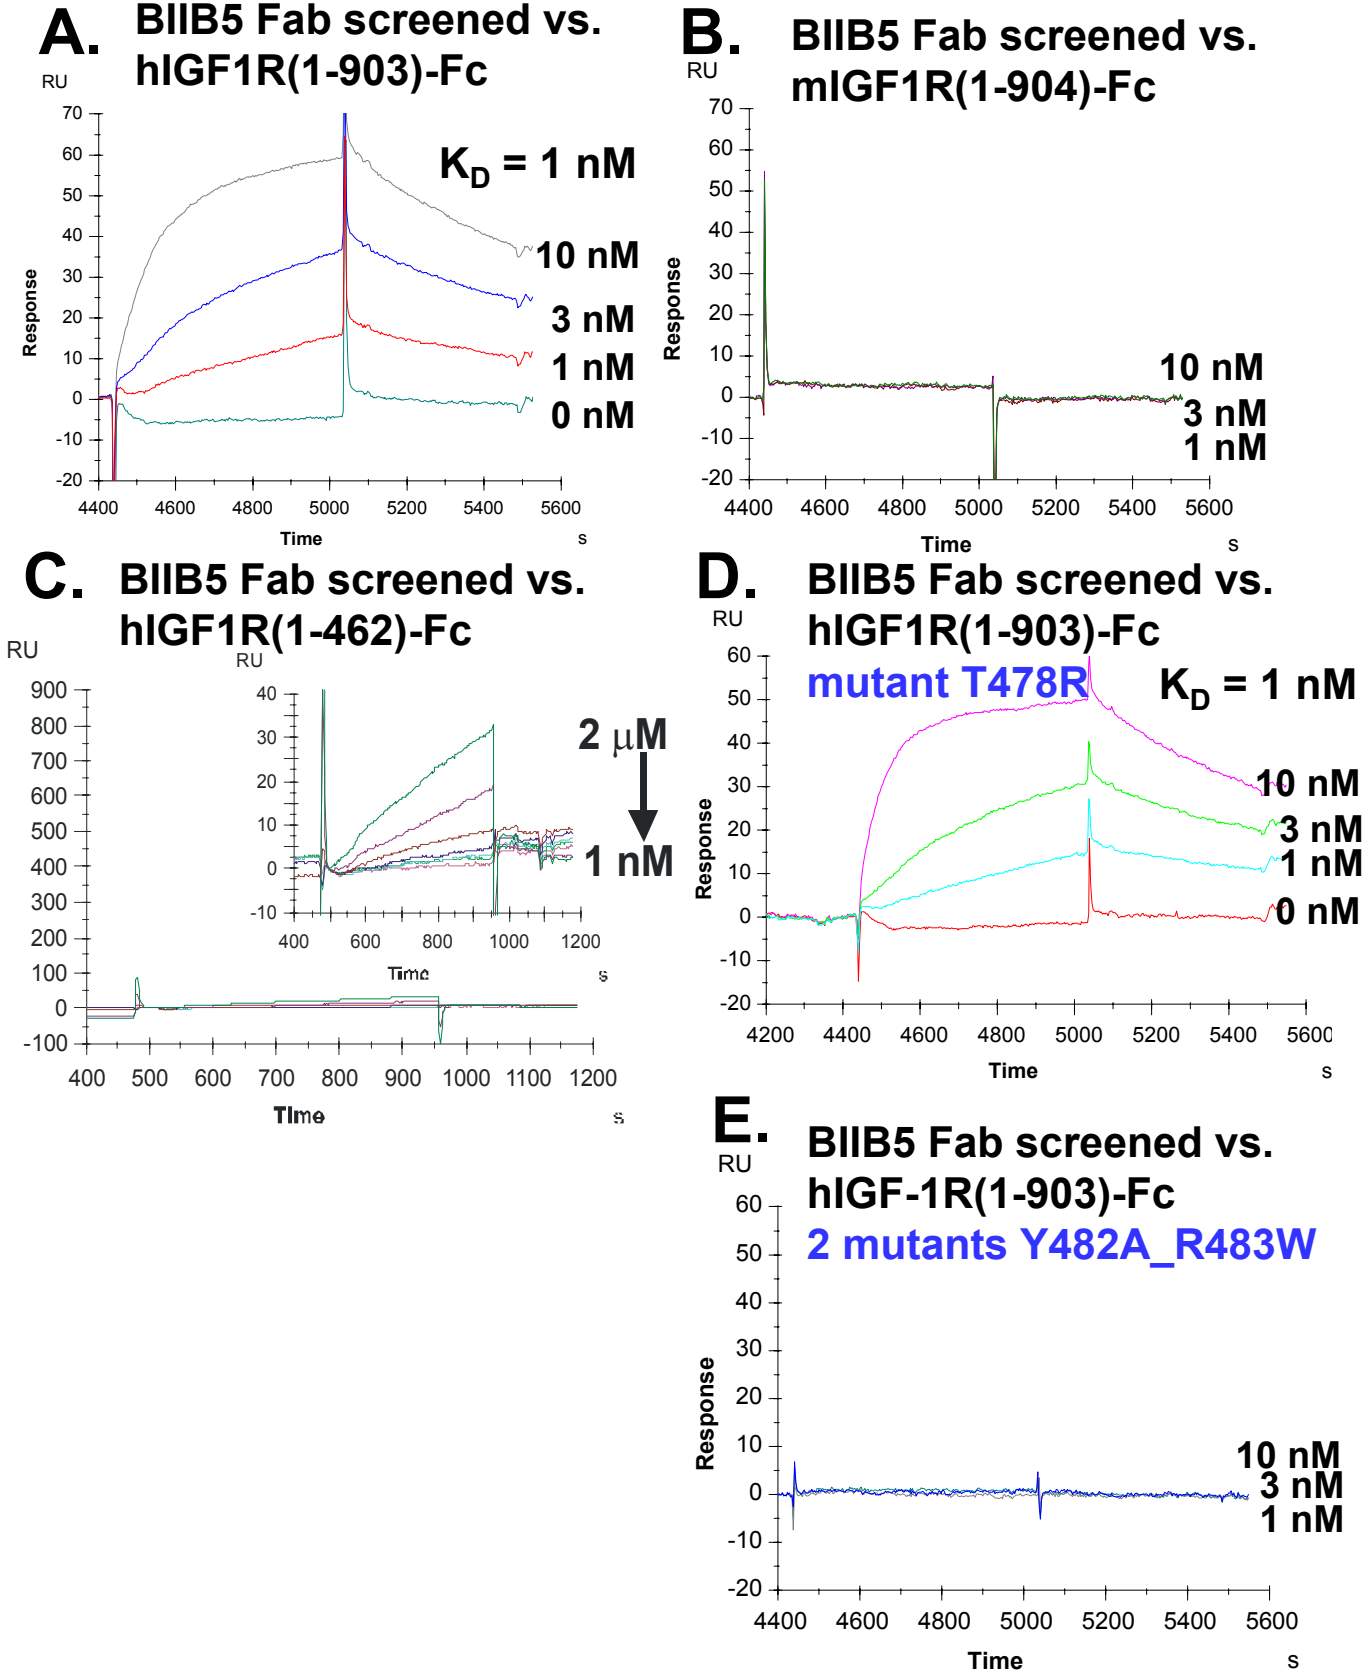

**Suppl. Fig. 2.** Kinetic binding curves of the BIIB4 Fab injected over sensor chip surfaces containing purified and immobilized A. hIGF-1R(1-903)-Fc, B. mIGF-1R(1-903)-Fc, C. hIGF-1R(1-462), D. hIGF-1R(1-903)-Fc(D250S), E. hIGF-1R(1-903)-Fc(N254A), and F. hIGF-1R(1-903)-Fc(I255A).

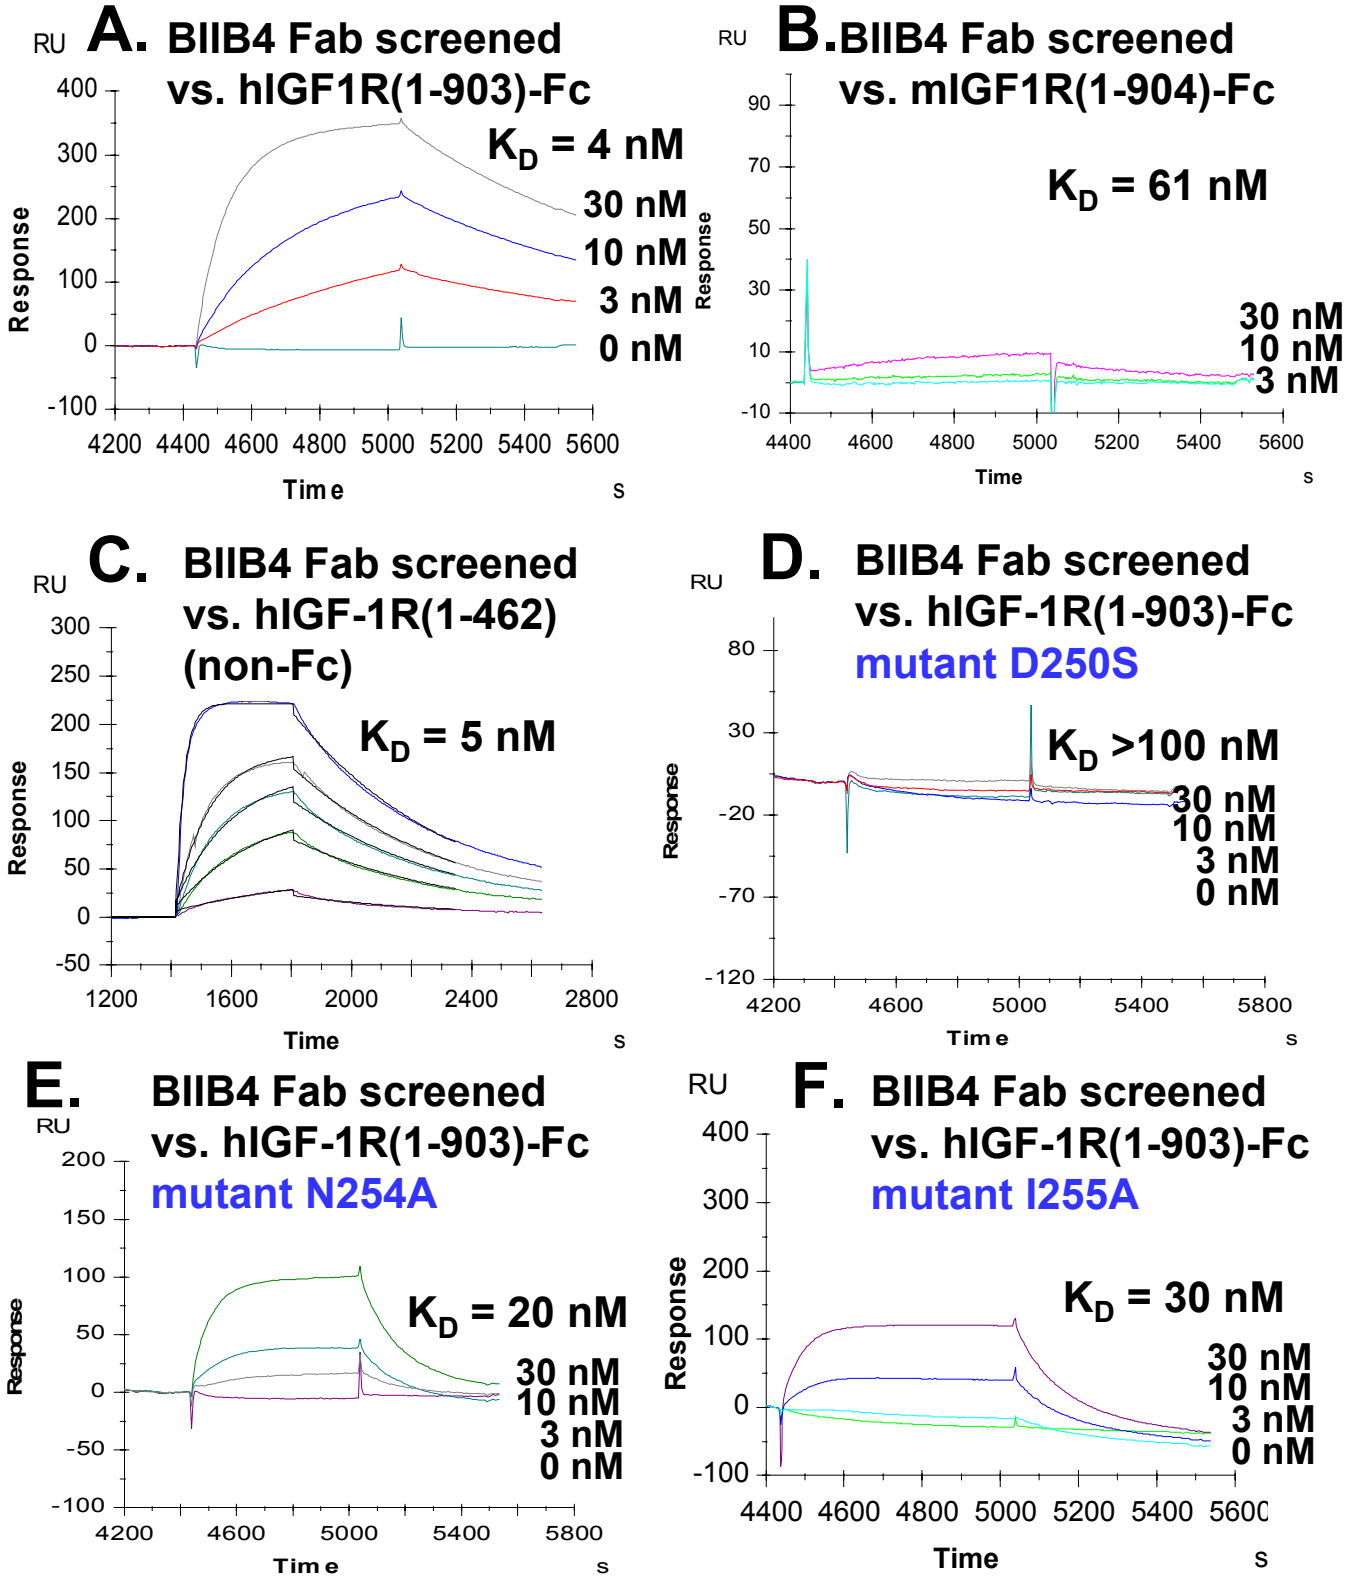

**Suppl. Fig. 3.** A. Analytical SEC chromatogram of hIGF-1R(1-903). Static light scattering yielded a measured soluble molecular weight of 240 kDa (including glycans). B. DSC unfolding profile of hIGF-1R(1-903),  $T_M = 61\text{ }^\circ\text{C}$ .

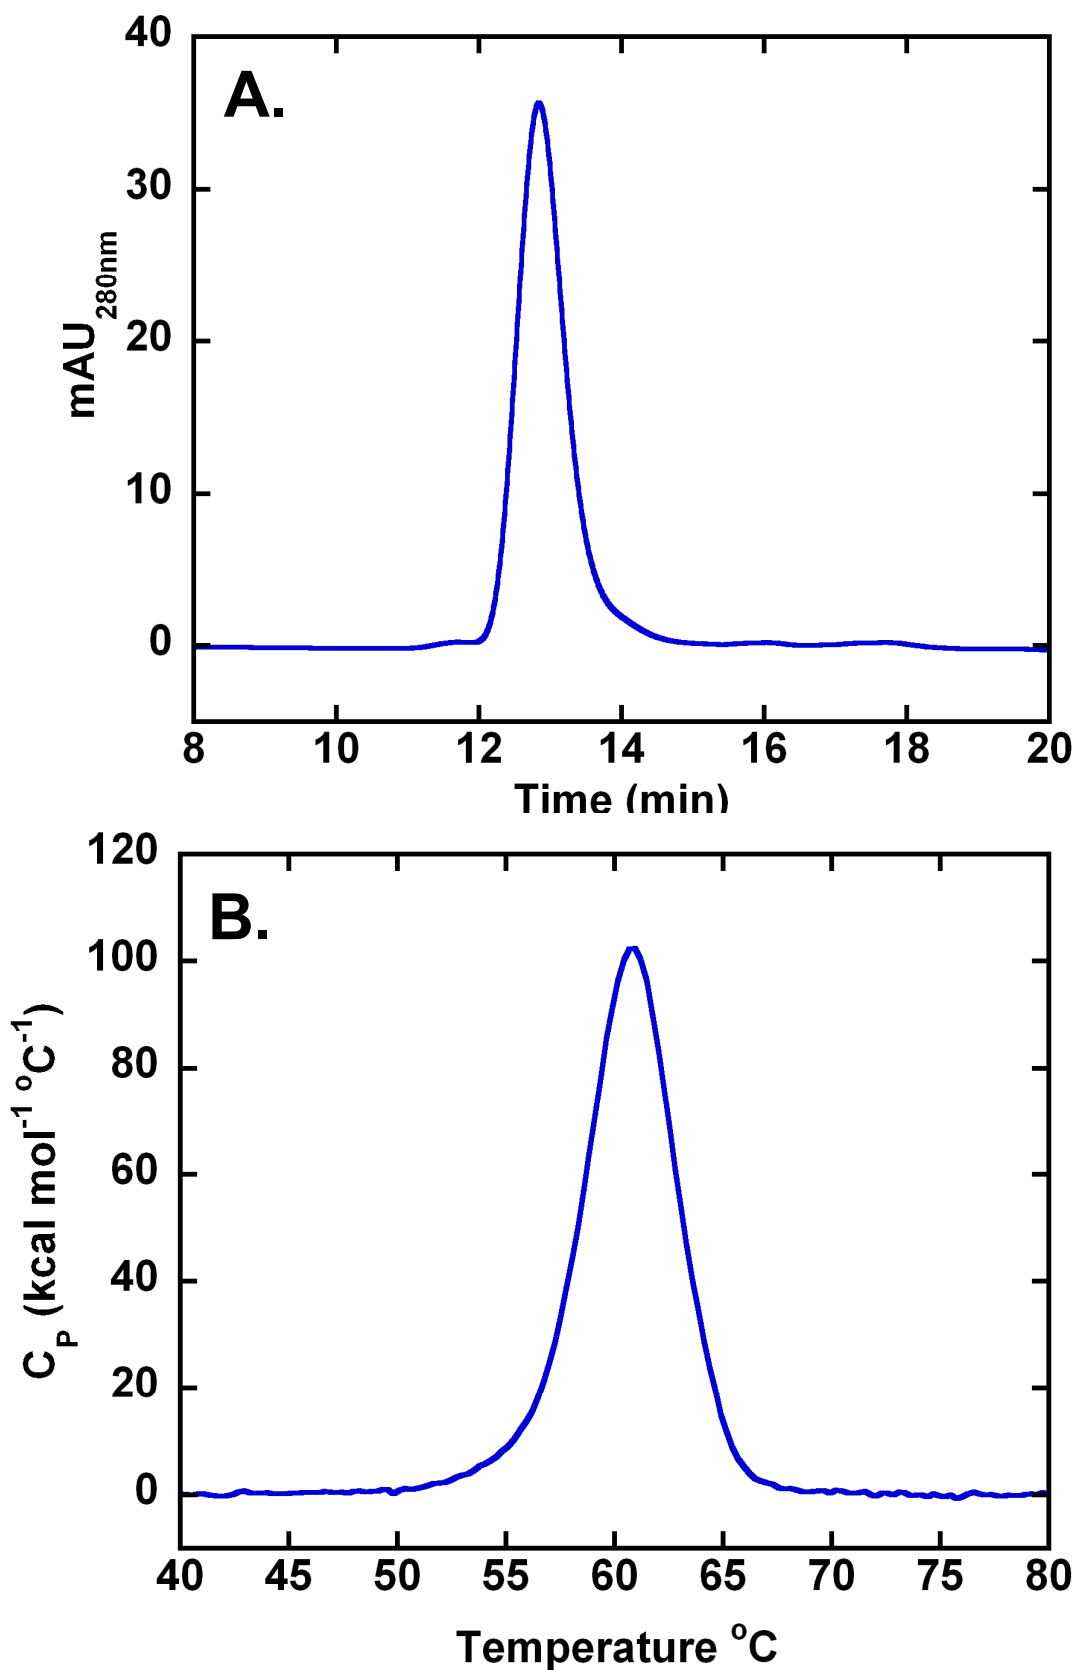

Supplement: M809709200_1.pdf [file M809709200_1.pdf]
